# CONTROVERSY IN CLINICAL ENDOCRINOLOGY

## The Optimal Treatment for Pediatric Graves' Disease Is Surgery

James A. Lee, Melvin M. Grumbach, and Orlo H. Clark

Department of Surgery (J.A.L., O.H.C.), Comprehensive Cancer Center at Mount Zion, Medical Center, University of California, San Francisco, San Francisco, California 94143-1764; and Department of Pediatrics (M.M.G.), University of California, San Francisco, San Francisco, California 94143-0434

THE TREATMENT OF pediatric Graves' disease remains one of the great controversies in pediatric endocrinology. Whereas most patients undergo a trial of antithyroid drug therapy, there is a high failure rate with this treatment and alternative therapies become important (1). The debate between radioactive iodine (RAI) ablation *vs.* surgery as definitive management of pediatric Graves' disease is centered on the potential adverse consequences of RAI *vs.* the complications of thyroidectomy. Without long-term, prospective, randomized-control trials, practitioners are left to base treatment decisions on individual expertise. Our practice has been to recommend surgery in children and young adults, and not RAI, for a number of reasons.

Much of the controversy surrounding RAI therapy for pediatric Graves' disease concerns its potential teratogenic effects, especially on the thyroid. We know from the literature that thyroid cancers after radiation exposure usually present after several decades, with a third of cancers presenting after more than 20 yr (2, 3). Furthermore, from the aftermath of Chernobyl, Hiroshima, and Nagasaki, we know that children (especially those younger than 5 yr at the time of exposure) are at increased risk for developing thyroid cancer after radiation exposure (4–7). These cancers may present as early as 4 yr after exposure or up to many decades later. Given these considerations, even ardent supporters of RAI in children suggest that it should be avoided in those younger than 5 yr old (8). Although a few studies suggest that there is no increased risk of thyroid cancer with RAI for pediatric Graves' disease, until recently there had been no studies looking at long term follow-up (9–11).

As such, Read *et al.* (12) undertook the daunting task of collecting 26- to 36-yr follow-up data for children who received RAI for Graves' disease. Their data confirmed a number of findings. First, they documented that remission of hyperthyroidism is directly correlated with dose of RAI and that the risk of genetic defects in offspring was not increased. Whereas their efforts represent a tour de force in the era of Health Insurance Portability and Accountability Act (HIPAA),

their data did not settle the crucial question of long-term malignancy risk to the thyroid with modern RAI regimens because most of their patients received low-dose RAI, and only a small percentage of these patients received high-dose RAI equivalent to that used in today's treatments. Indeed, the bulk of these data is moot because few physicians today treat patients with low-dose RAI. Whereas one expects that higher ablative doses would decrease the chance of malignancy, there are reported cases of thyroid malignancy, even after high-dose RAI therapy (3). Worse, these malignancies tend to be more aggressive (3, 13). Without long-term follow-up in patients receiving high-dose RAI, we cannot know its true carcinogenic effect on the thyroid.

In addition to concerns about potential thyroid malignancy, we do not know the full malignant potential for the rest of the body with higher doses of RAI. This notion of increased total body cancer risk with high-dose RAI is supported by a Swedish investigation that found a statistically significant increased risk of brain, kidney, and stomach cancers (with the latter increasing over time and with increased dose) in 10,000 patients who received RAI (14). Indeed, the authors conclude that "if anything, risks at low doses might be lower than predicted from high-dose therapy." Without long-term follow-up of a significant number of patients receiving high-dose RAI, we cannot know its full malignant potential.

Another pitfall of RAI therapy is the potential for inducing hyperparathyroidism. From decades of experience, we know that both internal and external radiation exposure predispose one to developing primary hyperparathyroidism in a dose-related manner (15, 16). Gorman and Robertson (17) demonstrated that tissue immediately adjacent to hot thyroid nodules received carcinogenic doses of radiation in patients treated with RAI. This concept has been borne out in many studies that have found instances of hyperparathyroidism many years after RAI (18–20). Indeed, Esselstyn *et al.* (21) found an incidence of hyperparathyroidism after RAI that was "several times normal." Similarly, Triggs and Williams (16) reported that 10 of 159 patients developed hyperparathyroidism after RAI therapy for Graves' disease as children or adolescents, a rate that is higher than expected from the general population. In addition, Ito and colleagues (18, 20) found that patients treated with RAI were more likely to

Abbreviation: RAI, Radioactive iodine.

JCEM is published monthly by The Endocrine Society (<http://www.endo-society.org>), the foremost professional society serving the endocrine community.

develop hyperparathyroidism than those treated with anti-thyroid drugs. Clearly, close screening is required for patients undergoing RAI therapy to prevent the possible adverse effects of hyperparathyroidism. We are not aware of any increased risk of developing hyperparathyroidism after antithyroid drug therapy or thyroidectomy. In addition to the metabolic problems of hyperparathyroidism itself, these patients may require a subsequent cervical exploration. Although it has not been our experience, Waldhausen (22) warns that "subsequent surgery is more difficult because of tissue scarring and distortion" due to RAI-induced damage.

Finally, patients receiving RAI therapy have slightly higher mortality rates than those not receiving RAI. This small but statistically significant increase in cardiovascular and overall mortality when compared with the population at large has been documented in a number of studies (2, 13, 23, 24). In the study by Read *et al.* (12), two of the 116 original patients died soon after RAI therapy. Whereas one patient's lethal hepatic necrosis likely resulted from antithyroid medications, the second patient death 10 d after treatment seems directly related to RAI therapy. In contrast, the mortality rate after thyroidectomy is less than 0.1% and in some large series is 0% in patients with Graves' disease (16, 25, 26).

Unlike RAI therapy, the risks and outcomes for surgery have been known since Kocher's first successful series of thyroidectomies in 1883 (27). In the hands of experienced surgeons, thyroidectomy yields cure rates in excess of 97% with low complication rates equivalent to that of high-dose RAI (1, 8, 11, 28). Multiple series report surgical complication rates of less than 1–2% (29). Furthermore, research has demonstrated the intuitive concept that surgeons who perform higher volumes of thyroidectomy have better outcomes (30). Clearly, patients should be referred to a surgeon with extensive experience with pediatric thyroidectomy, even if this means traveling outside the local area. The choice of operation depends primarily on the desired end point. If control of hyperthyroidism is the most important factor, most surgeons recommend total or near-total thyroidectomy because complication rates are comparable with subtotal resection, there is less chance of worsening ophthalmopathy (although few children have significant eye disease to begin with), less tissue left at risk for undergoing malignant transformation, and a lower recurrence rate than with subtotal resection (22). Unfortunately, partially due to the variability in judging remnant size, recurrence can occur in 1.2–16.2% of patients undergoing subtotal thyroidectomy (31). However, if achieving euthyroidism is paramount, then we recommend leaving a thyroid remnant of 2–4 g because children are more prone to recurrence than adults (32). For patients with recurrent hyperthyroidism, we typically recommend RAI ablation because of the increased risk of complications associated with a second operation.

Clear indications for thyroidectomy include patient preference, noncompliance with medical or RAI regimens, suspicious nodules or known cancer, pregnancy, large glands (>80 g), inadequate uptake on RAI scan, requirement for immediate control of disease, obstructive or compressive symptoms, necessity for euthyroidism as an end point, and age younger than 5 yr. Although the remission rates are similar for high-dose RAI and surgery with virtually all

patients requiring thyroid hormone supplementation, the small but increased risk of death, nonthyroid neoplasms, hyperparathyroidism, and potential increase in thyroid malignancy make surgery a more appealing option than high-dose RAI, especially in children. Clearly, this issue calls for a large randomized-control study with long-term follow-up to settle this issue definitively. In the interim, surgical management by an experienced surgeon appears to be the safest, most effective treatment for children with Graves' disease.

## Acknowledgments

Received June 9, 2006. Accepted December 19, 2006.

Address all correspondence and requests for reprints to: Orlo H. Clark, M.D., Department of Surgery, University California, San Francisco, Comprehensive Cancer Center at Mount Zion, Medical Center, 1600 Divisadero Street, Hellman Building, Room C347, San Francisco, California 94143-1764. E-mail: clarko@surgery.ucsf.edu.

The authors have nothing to disclose.

## References

1. Dobyns BM, Sheline GE, Workman JB, Tompkins EA, McConahey WM, Becker DV 1974 Malignant and benign neoplasms of the thyroid in patients treated for hyperthyroidism: a report of the cooperative thyrotoxicosis therapy follow-up study. *J Clin Endocrinol Metab* 38:976–998
2. Ron E, Doody MM, Becker DV, Brill AB, Curtis RE, Goldman MB, Harris 3rd BS, Hoffman DA, McConahey WM, Maxon HR, Preston-Martin S, Warshauer ME, Wong FL, Boice Jr JD 1998 Cancer mortality following treatment for adult hyperthyroidism. Cooperative Thyrotoxicosis Therapy Follow-Up Study Group. *JAMA* 280:347–355
3. Tezelman S, Grossman RE, Siperstein AE, Clark OH 1994 Radioiodine-associated thyroid cancers. *World J Surg* 18:522–528
4. DeGroot LJ 1993 Effects of irradiation on the thyroid gland. *Endocrinol Metab Clin North Am* 22:607–615
5. McDougall IR 1989 Which therapy for Graves' hyperthyroidism in children? *Nucl Med Commun* 10:855–857
6. Rivkees SA, Sklar C, Freemark M 1998 Clinical review 99: the management of Graves' disease in children, with special emphasis on radioiodine treatment. *J Clin Endocrinol Metab* 83:3767–3776
7. Takeichi N, Ezaki H, Dohi K 1991 A review of forty-five years study of Hiroshima and Nagasaki atomic bomb survivors. Thyroid cancer: reports up to date and a review. *J Radiat Res (Tokyo)* 32(Suppl):180–188
8. Rivkees SA 2001 The use of radioactive iodine in the management of hyperthyroidism in children. *Curr Drug Targets Immune Endocr Metab Disord* 1:255–264
9. Hamburger JI 1985 Management of hyperthyroidism in children and adolescents. *J Clin Endocrinol Metab* 60:1019–1024
10. Kogut MD, Kaplan SA, Collipp PJ, Tiamsic T, Boyle D 1965 Treatment of hyperthyroidism in children. Analysis of forty-five patients. *N Engl J Med* 272:217–221
11. Safa AM, Schumacher OP, Rodriguez-Antunez A 1975 Long-term follow-up results in children and adolescents treated with radioactive iodine (<sup>131</sup>I) for hyperthyroidism. *N Engl J Med* 292:167–171
12. Read Jr CH, Tansey MJ, Menda Y 2004 A 36-year retrospective analysis of the efficacy and safety of radioactive iodine in treating young Graves' patients. *J Clin Endocrinol Metab* 89:4229–4233
13. Franklyn JA, Maisonneuve P, Sheppard MC, Betteridge J, Boyle P 1998 Mortality after the treatment of hyperthyroidism with radioactive iodine. *N Engl J Med* 338:712–718
14. Holm LE, Hall P, Wiklund K, Lundell G, Berg G, Bjelkengren G, Cederquist E, Ericsson UB, Hallquist A, Larsson LG, et al 1991 Cancer risk after iodine-131 therapy for hyperthyroidism. *J Natl Cancer Inst* 83:1072–1077
15. Schneider AB, Gierlowski TC, Shore-Freedman E, Stovall M, Ron E, Lubin J 1995 Dose-response relationships for radiation-induced hyperparathyroidism. *J Clin Endocrinol Metab* 80:254–257
16. Triggs SM, Williams ED 1977 Irradiation of the thyroid as a cause of parathyroid adenoma. *Lancet* 1:593–594
17. Gorman CA, Robertson JS 1978 Radiation dose in the selection of <sup>131</sup>I or surgical treatment for toxic thyroid adenoma. *Ann Intern Med* 89:85–90
18. Ito K, Tsuchiya T, Sugino K, Murata M 1996 [An evaluation of the incidence of hyperparathyroidism after <sup>131</sup>I treatment for Basedow disease (part II)]. *Kaku Igaku* 33:737–742
19. Rosen IB, Strawbridge HG, Bain J 1975 A case of hyperparathyroidism associated with radiation to the head and neck area. *Cancer* 36:1111–1114

20. **Tsuchiya T, Ito K, Murata M** 1996 [An evaluation of the incidence of hyperparathyroidism after <sup>131</sup>I treatment for Basedow disease (part I)]. *Kaku Igaku* 33:729–735
21. **Esselstyn Jr CB, Schumacher OP, Eversman J, Sheeler L, Levy WJ** 1982 Hyperparathyroidism after radioactive iodine therapy for Graves disease. *Surgery* 92:811–813
22. **Waldhausen JH** 1997 Controversies related to the medical and surgical management of hyperthyroidism in children. *Semin Pediatr Surg* 6:121–127
23. **Franklyn JA, Sheppard MC, Maisonneuve P** 2005 Thyroid function and mortality in patients treated for hyperthyroidism. *JAMA* 294:71–80
24. **Parker JL, Lawson DH** 1973 Death from thyrotoxicosis. *Lancet* 2:894–895
25. **Dotsch J, Rascher W, Dorr HG** 2003 Graves disease in childhood: a review of the options for diagnosis and treatment. *Paediatr Drugs* 5:95–102
26. **Gaujoux S, Leenhardt L, Tresallet C, Rouxel A, Hoang C, Jublanc C, Chigot JP, Menegaux F** 2006 Extensive thyroidectomy in Graves' disease. *J Am Coll Surg* 202:868–873
27. **Modlin IM** 1998 Surgical triumvirate of Theodor Kocher, Harvey Cushing, and William Halsted. *World J Surg* 22:103–113
28. **Miccoli P, Vitti P, Rago T, Iacconi P, Bartalena L, Bogazzi F, Fiore E, Valleriano R, Chiovato L, Rocchi R, Pinchera A** 1996 Surgical treatment of Graves' disease: subtotal or total thyroidectomy? *Surgery* 120:1020–1024; discussion 1024–1025
29. **Kebebew E, Clark OH** 2000 Differentiated thyroid cancer: "complete" rational approach. *World J Surg* 24:942–951
30. **Sosa JA, Bowman HM, Tielsch JM, Powe NR, Gordon TA, Udelsman R** 1998 The importance of surgeon experience for clinical and economic outcomes from thyroidectomy. *Ann Surg* 228:320–330
31. **Mittendorf EA, McHenry CR** 2001 Thyroidectomy for selected patients with thyrotoxicosis. *Arch Otolaryngol Head Neck Surg* 127:61–65
32. **Lal G, Ituarte P, Kebebew E, Siperstein A, Duh QY, Clark OH** 2005 Should total thyroidectomy become the preferred procedure for surgical management of Graves' disease? *Thyroid* 15:569–574

JCEM is published monthly by The Endocrine Society (<http://www.endo-society.org>), the foremost professional society serving the endocrine community.
